# Supplementary material for: Direct synthesis of ordered mesoporous materials constructed with polymer–silica hybrid frameworks
Source: Royal Society of Chemistry journal article supplement (doi:10.1039/b402037e), 2004-01-01
Supplement: b402037e.pdf [file b402037e.pdf]

**Electronic supplementary information** for manuscript entitled “Direct synthesis of ordered mesoporous materials constructed with polymer-silica hybrid frameworks” written by Kang et al.

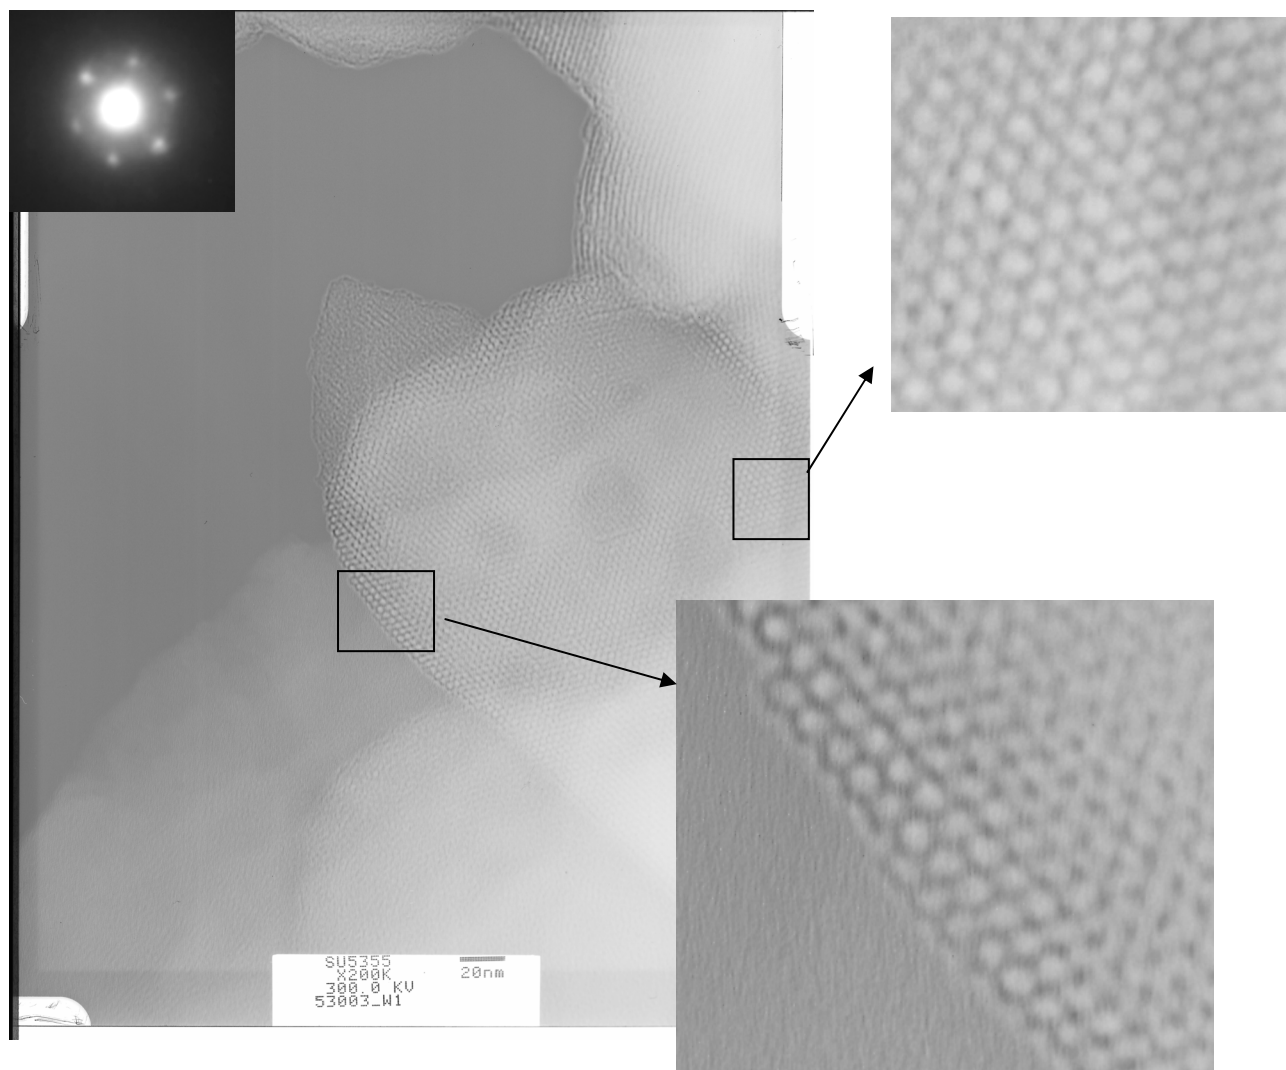

**Fig. S1.** TEM image of the MCM-41-PAA-20 sample after the removal of template
